# Supplementary material
Source: PubMed Central journal article supplement (PMC3690274)

Fig. 1 supp, Li et al

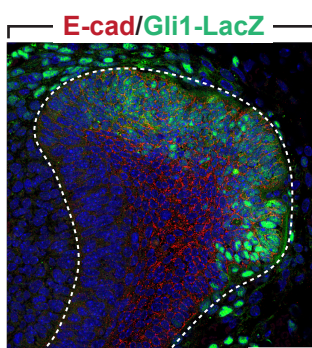

Supplement: NIHMS484843-supplement-01.pdf [file NIHMS484843-supplement-01.pdf]

Fig. 2 supp, Li et al

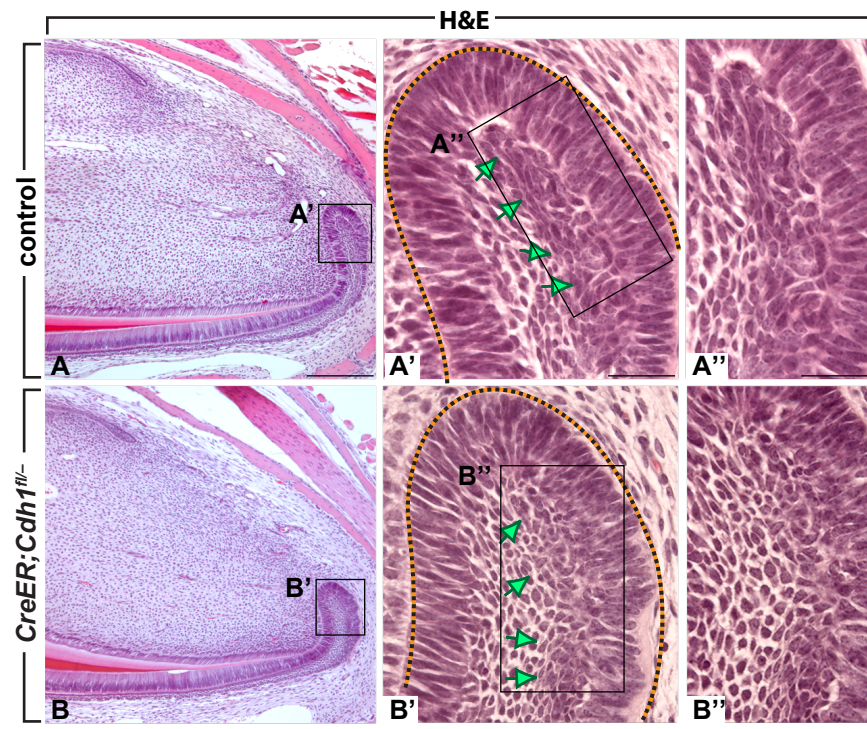

Supplement: NIHMS484843-supplement-02.pdf [file NIHMS484843-supplement-02.pdf]

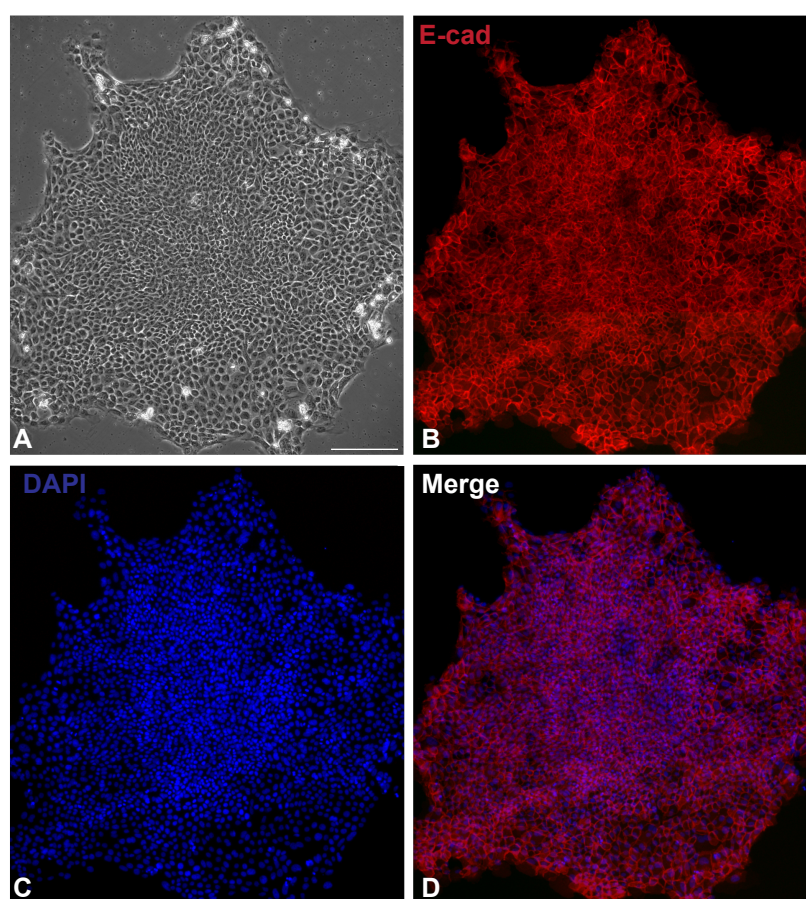

Supplement: NIHMS484843-supplement-03.pdf [file NIHMS484843-supplement-03.pdf]

Fig. 4 supp, Li et al

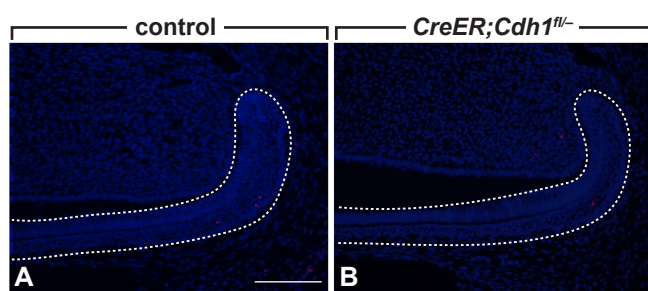

Supplement: NIHMS484843-supplement-04.pdf [file NIHMS484843-supplement-04.pdf]

Fig. 5 supp, Li et al

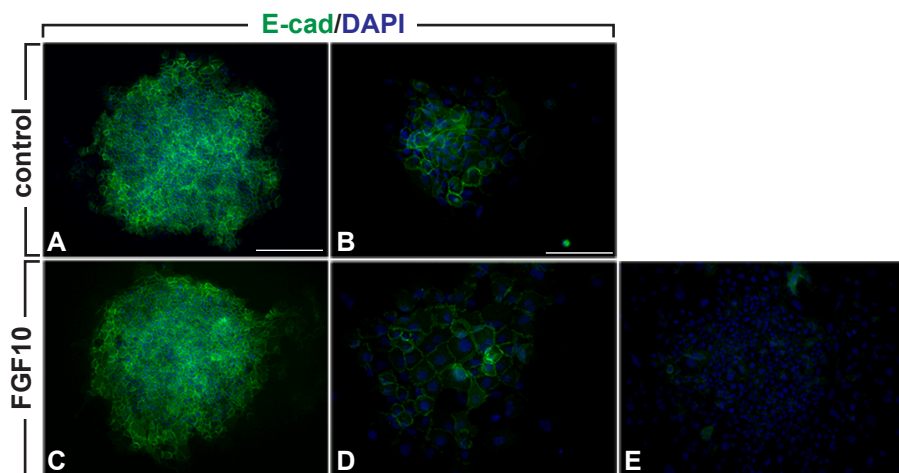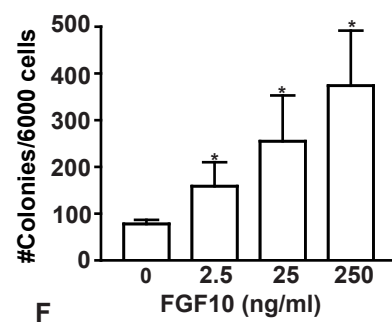

Supplement: NIHMS484843-supplement-05.pdf [file NIHMS484843-supplement-05.pdf]

Fig. 6 supp, Li et al

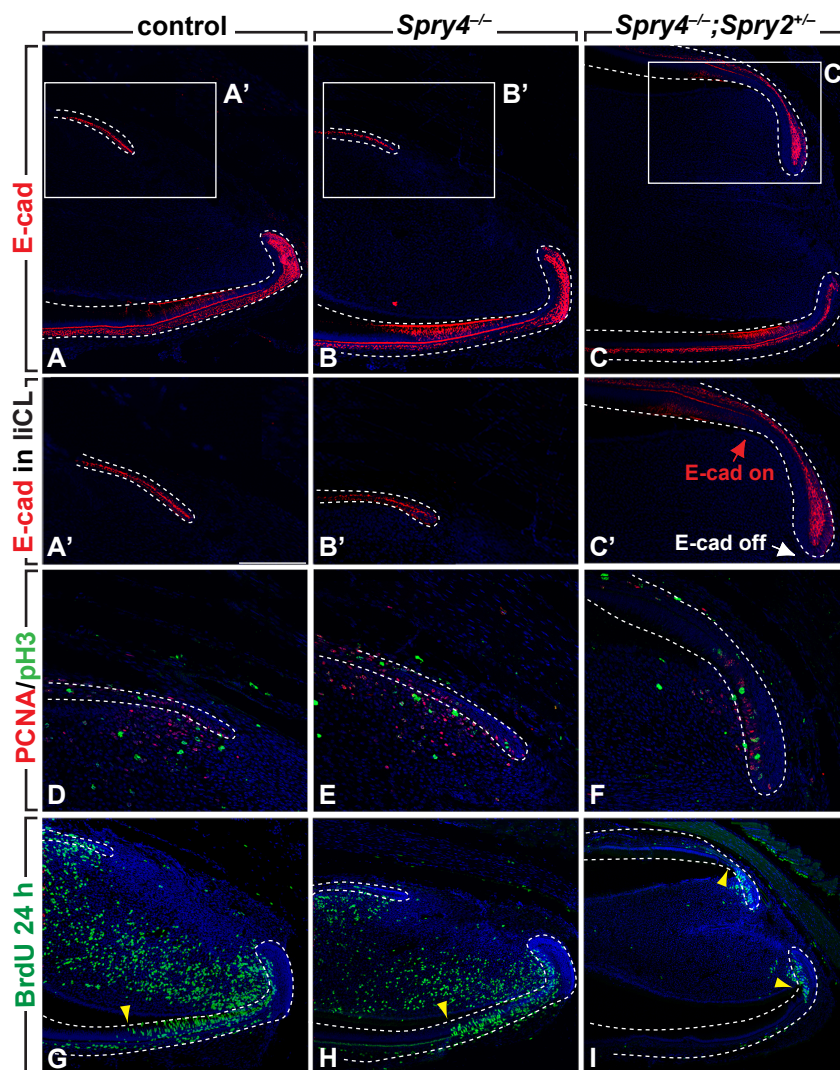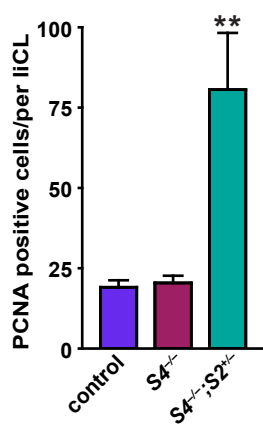

J

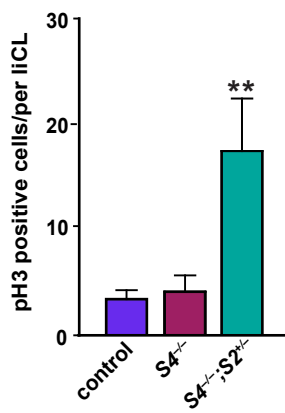

K

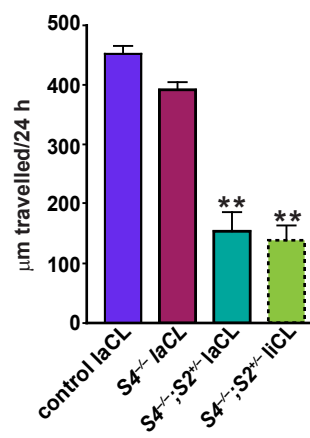

L

Supplement: NIHMS484843-supplement-06.pdf [file NIHMS484843-supplement-06.pdf]

Fig. 7 supp, Li et al

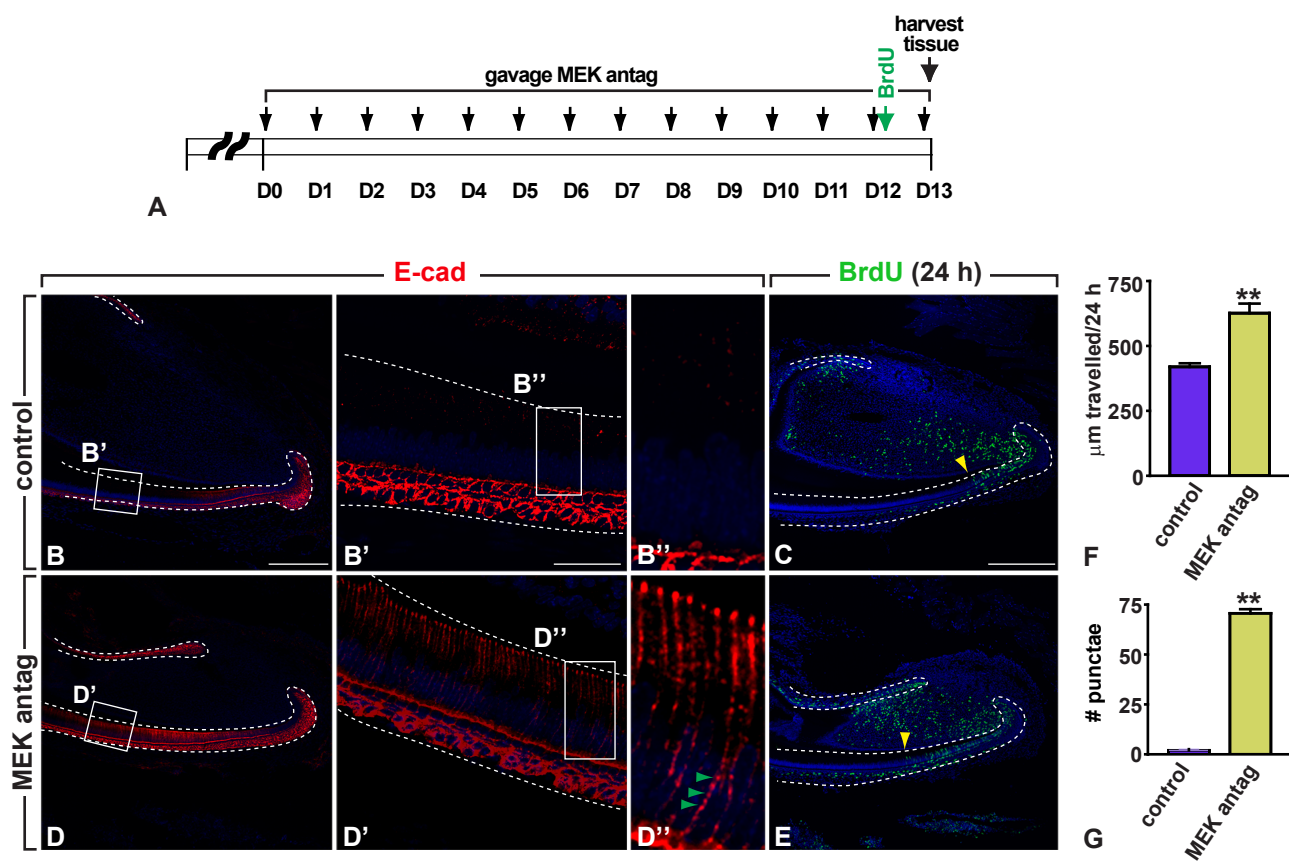

Supplement: NIHMS484843-supplement-07.pdf [file NIHMS484843-supplement-07.pdf]
